# Supplementary material for: Presence of Methicillin-Resistant Staphylococcus aureus (MRSA) on Healthcare Workers’ Attire: A Systematic Review
Source: PubMed Central journal article supplement (PMC8103237; doi:10.3390/tropicalmed6020042), 2021-03-31

**Table S2.** Risk-of-bias for each included randomized controlled trial.

(+) Low risk of bias; (?) unclear risk of bias; (-) high risk of bias

|                        | Randomization process | Deviations from intended interventions | Missing outcome data | Measurement of the outcome | Selection of the reported result | Overall |
|------------------------|-----------------------|----------------------------------------|----------------------|----------------------------|----------------------------------|---------|
| Burden et al. (2011)   | +                     | +                                      | +                    | +                          | +                                | +       |
| Anderson et al. (2017) | +                     | +                                      | +                    | +                          | +                                | +       |

Risk-of-bias graph: judgement by review authors in each risk of bias category presented as percentage of all included studies

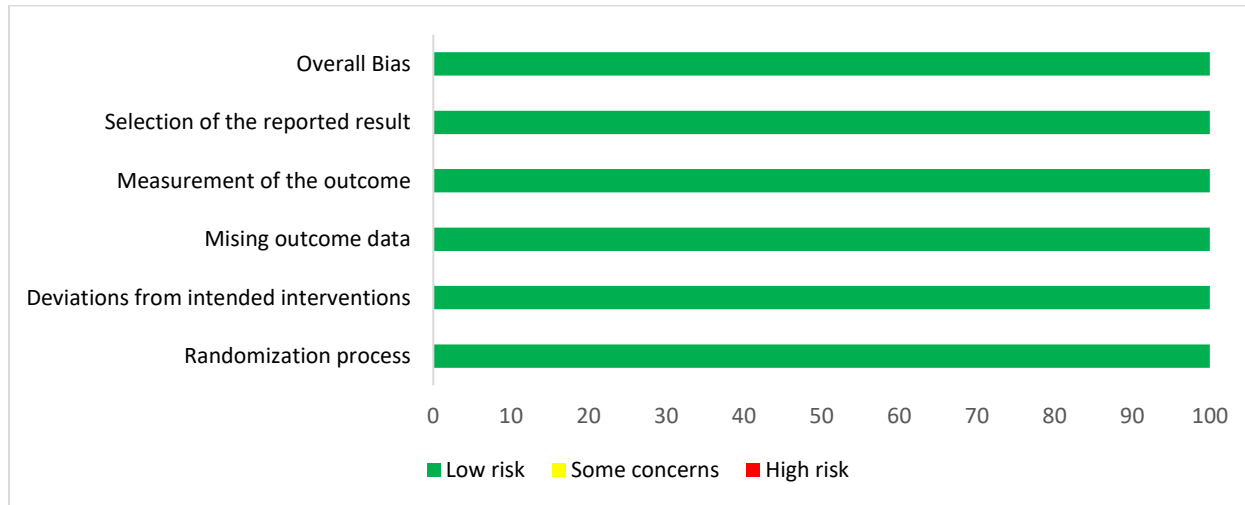

Supplement: tropicalmed-06-00042-s001.pdf [file tropicalmed-06-00042-s001.pdf]
